# Supplementary material for: The Effect of Ethanol on Lipid Nanoparticle Stabilization from a Molecular Dynamics Simulation Perspective
Source: MDPI journal article supplement (doi:10.3390/molecules28124836), 2023-06-17
Supplement: s1 [file s1]

Article

# The Effect of Ethanol on Lipid Nanoparticle Stabilization from a Molecular Dynamics Simulation Perspective

Ari Hardianto <sup>1,2,\*</sup>, Zahra Silmi Muscifa <sup>2</sup>, Wahyu Widayat <sup>2,3</sup>, Muhammad Yusuf <sup>1,2</sup> and Toto Subroto <sup>1,2</sup>

<sup>1</sup> Department of Chemistry, Faculty of Mathematics and Natural Sciences, Universitas Padjadjaran, Jatinangor 45363, West Java, Indonesia; m.yusuf@unpad.ac.id (M.Y.); t.subroto@unpad.ac.id (T.S.)

<sup>2</sup> Research Center for Molecular Biotechnology and Bioinformatics, Universitas Padjadjaran, Bandung 40133, West Java, Indonesia; zahra\_silmi@apps.ipb.ac.id (Z.S.M.); wahyu@farmasi.unmul.ac.id (W.W.)

<sup>3</sup> Faculty of Pharmacy, Mulawarman University, Samarinda 75119, East Kalimantan, Indonesia

\* Correspondence: a.hardianto@unpad.ac.id

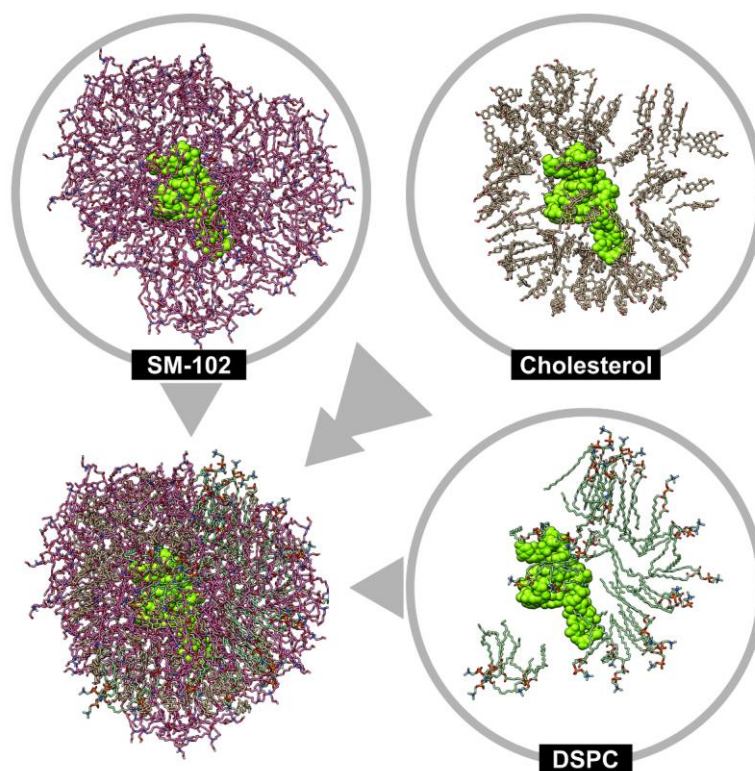

**Figure S1.** The arrangement every lipid component in LNP resulted by the MD simulation of the self-assembly system with N/P 15:2.

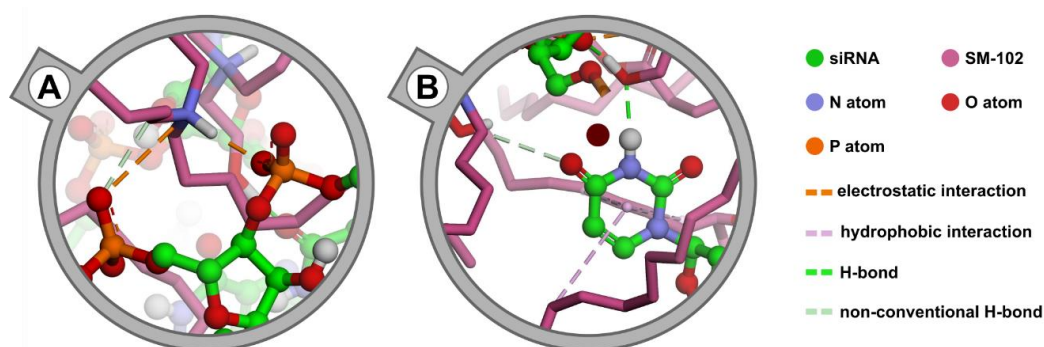

**Figure S2.** Intermolecular interactions between siRNA and SM-102 lipid.

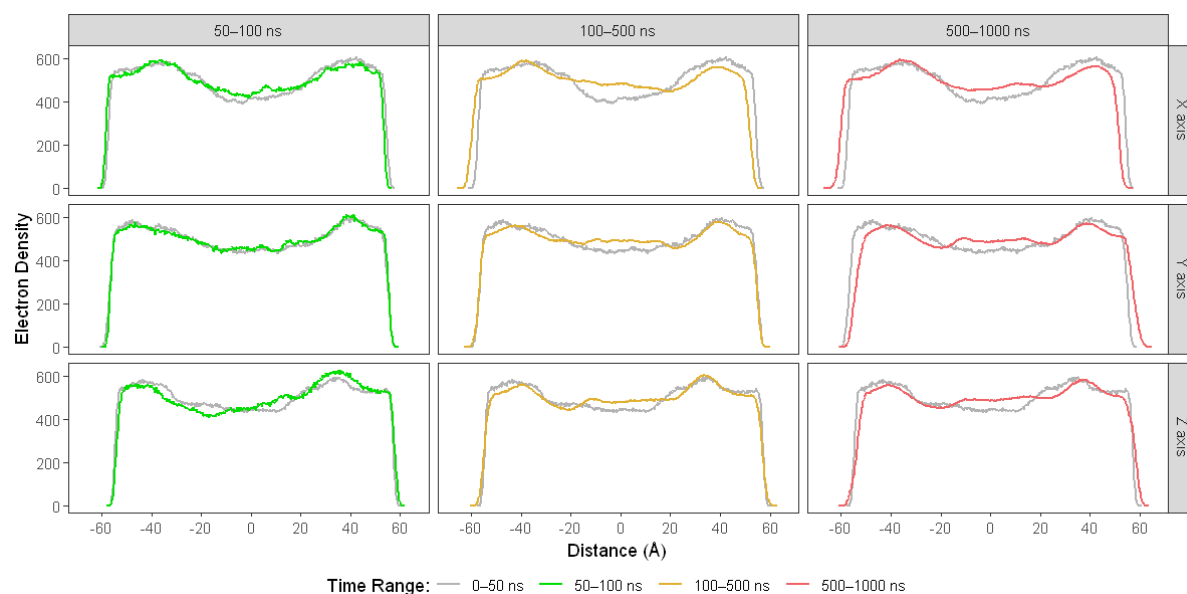

**Figure S3.** Electron density profiles of the ethanol in the LNPs system for 1000 ns of MD simulation.

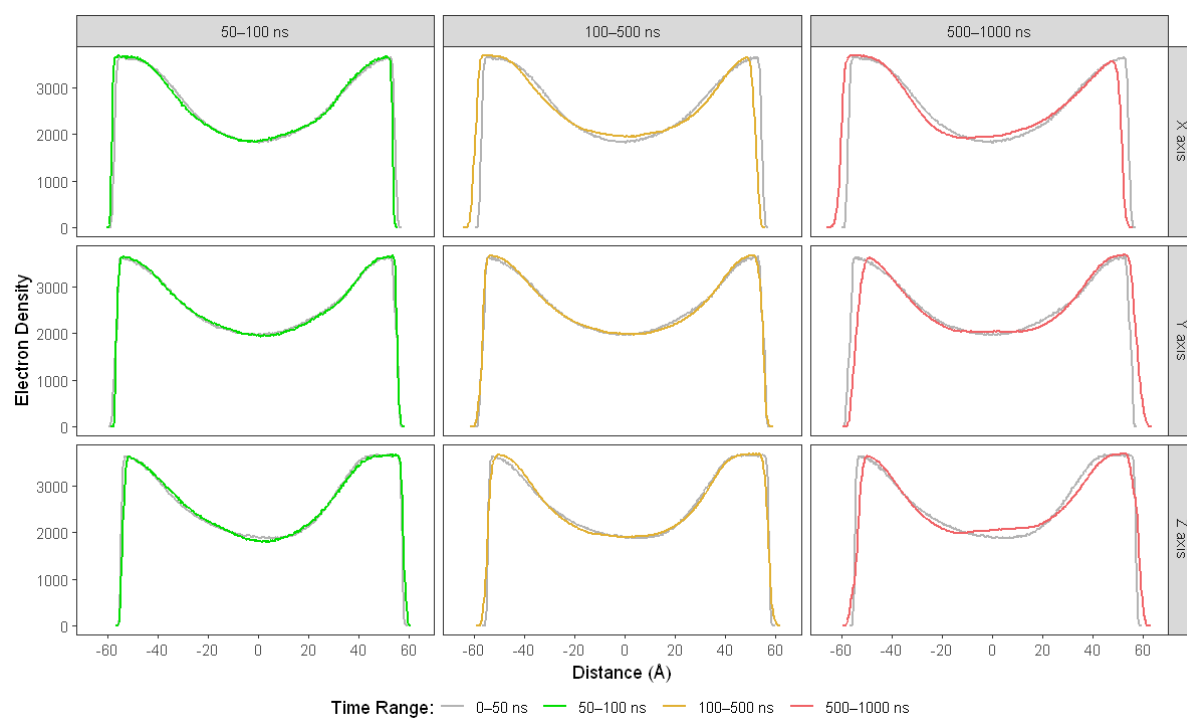

**Figure S4.** Electron density profiles of the water in the LNPs system for 1000 ns of MD simulation.

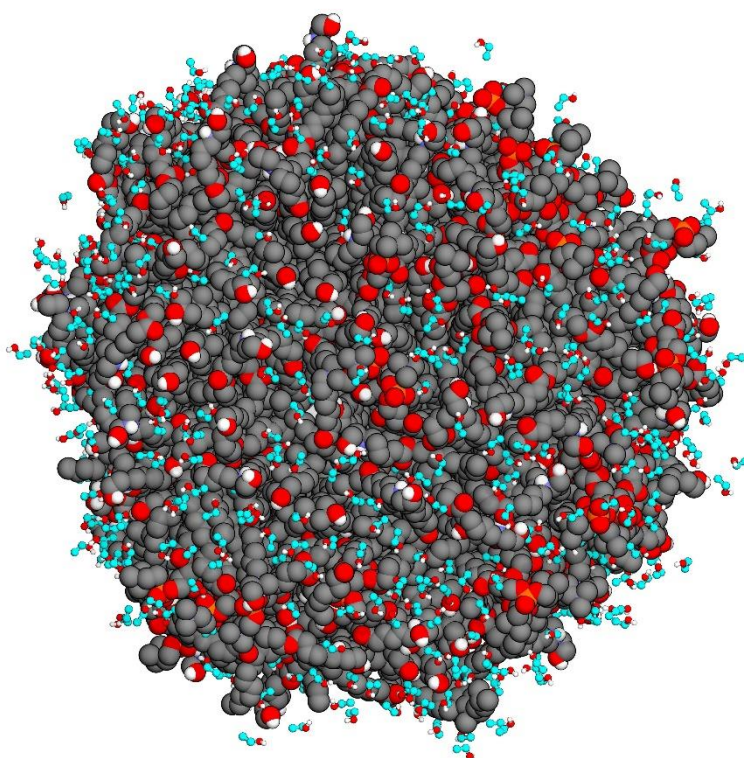

**Figure S5.** Visualization of ethanol molecules around LNP within 5 Å. Carbon atoms of ethanol molecules are in a cyan color.

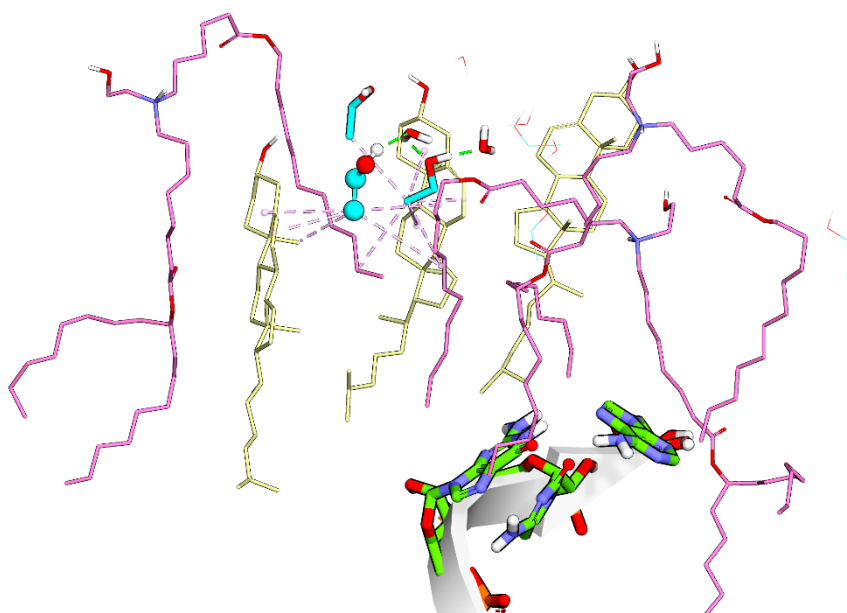

**Figure S6.** Intermolecular interactions among ethanol, lipid, and water molecules. Pink dashed lines indicate hydrophobic interactions, whereas the green ones are H-bonds.
